# Supplementary material for: Polyphosphide anion-mediated simultaneous P, Au co-alloying with Pd for anti-poisoning formic acid oxidation
Source: Royal Society of Chemistry journal article supplement (doi:10.1039/d4cc03188a), 2024-01-01
Supplement: d4cc03188a1.pdf [file d4cc03188a1.pdf]

**Supporting Information for**

**Polyphosphide anion-mediated simultaneous P, Au  
co-alloying with Pd for anti-poisoning formic acid oxidation**

Yilan Chen, Jian Dong, Shuke Huang, Jun Li, Chenyang Zhao\*

<sup>a</sup> College of Chemistry and Environmental Engineering, Shenzhen University,  
Shenzhen 518071, China.

*E-mails: cyzhao@szu.edu.cn (Chenyang Zhao)*

## Experimental

### Materials and reagents

Ethanol (C<sub>2</sub>H<sub>5</sub>OH, 99.7%) was purchased from Guangdong Guanghua Sci-Tech Co., Ltd. Palladium(II) acetylacetonate (Pd (AcAc)<sub>2</sub>, Pd<sub>2</sub>≥34.7 wt.%) was purchased from Innochem Chemical Reagent Company. Red phosphorus (98.5%), potassium ethoxide (KOEt, 98.5%), 1,2-dimethoxyethane (DME, 99%), perchloric acid (HClO<sub>4</sub>, 99.999%) and formic acid (AR, 88%) were purchased from Aladdin Chemical Reagent Company. Tetrahydrofuran (THF, 99%) and XC-72 conductive carbon black were purchased from Meryer Chemical Reagent Company. Chloroauric acid was purchased from Innochem Chemical Reagent Company. Commercial 10% Pd/C was purchased from Laajoo Chemical Reagent Company. The water used throughout all experiments was ultrapure water purified through a UPW system with resistance of 18.25 MΩ cm<sup>-1</sup>.

### Synthesis of soluble polyphosphide anions

All manipulations with air- and moisture-sensitive compounds were performed in an Ar-filled glovebox. Solid potassium ethoxide (KOEt, 400 mg) was dissolved in 15 mL of DME/THF (1:1 in volume) and red P (20 mg) was then added to the solution. After stirring at 85 °C for 2 hours, the resulting bright-orange suspension was centrifugalized, and the dark-red residue was dissolved in anhydrous EtOH to form a dark-red P<sub>n</sub><sup>-</sup> solution.

## Synthesis of P-PdAu

P-PdAu was synthesized through a one-pot approach, and the specific steps are as follows. First, 20 mg of carbon black (XC-72R) was dispersed in 20 mL of DMF under sonication for 40 min. Then,  $x$  mg ( $x = 5.05, 9.87, 13.7, 14$ ) of palladium acetylacetonate and  $y$   $\mu\text{L}$  ( $y = 162.5, 79, 12, 7.5$ ) of chloroauric acid were dissolved in the suspension. 5 mL of  $\text{P}_n^-$  solution was then slowly added. The reaction was kept in an Ar-filled glovebox under room temperature for 12h under stirring. Finally, the black solid was collected by centrifugation and washed with water, ethanol and acetone each 3 times. The samples are marked as P-Pd<sub>1</sub>Au<sub>1</sub>, P-Pd<sub>4</sub>Au<sub>1</sub>, P-Pd<sub>40</sub>Au<sub>1</sub> and P-Pd<sub>60</sub>Au<sub>1</sub> respectively based on the feeding molar ratio of Pd:Au. For comparison, P-Pd was also prepared in a similar way, but without the addition of chloroauric acid.

## Electrochemical measurements

The electrochemical measurements of the catalysts were performed on a CHI660E electrochemical workstation at room temperature. A three-electrode system was used with a Pt wire as the counter electrode, a saturated calomel electrode (SCE) as the reference electrode, and a glassy carbon rotating disk electrode (GC-RDE, geometric area = 0.196 cm<sup>2</sup>) as the working electrode. To prepare the catalyst ink, 2.5 mg of catalyst was dispersed in 1 mL mixture of water (900  $\mu\text{L}$ ), isopropanol (80  $\mu\text{L}$ ), and Nafion dispersion (5 wt.%, 20  $\mu\text{L}$ ) by sonication. 10  $\mu\text{L}$  of catalyst ink was dropped onto the GC-RDE and dried, resulting in a 5  $\mu\text{g}$  metal loading (based on the mass of Pd and Au). The sample was first activated by scanning between -0.26 and 0.91 V (vs.

SCE) at  $50 \text{ mV s}^{-1}$  in Ar-saturated  $0.1 \text{ M HClO}_4$  solution for 50 cycles and then subjected to the cyclic voltammetry (CV) and polarization tests.

The CO stripping test was performed in a mixture of  $0.1 \text{ M HClO}_4$  and  $0.05 \text{ M HCOOH}$ . Keeping the electrode potential at  $0.01 \text{ V}$  (vs. SCE), CO was first bubbled for 15 min, followed by Ar bubbling for 25 min to remove the excess CO. The CO stripping curves were then obtained by scanning between  $-0.27$  and  $0.89 \text{ V}$  at  $20 \text{ mV s}^{-1}$ . Assuming a value of  $420 \mu\text{C cm}^{-2}$  for a saturated CO monolayer on the Pd surface, the number of active sites ( $n$ ), electrochemical active specific surface area (ECSA) and turnover frequency (TOF) were calculated on basis of the CO stripping charges ( $Q_{\text{CO}}$ ) with the following equations:

$$n = Q_{\text{CO}}/2Fm$$

$$\text{ECSA} = Q_{\text{CO}}/(m \times 420 \mu\text{C cm}^{-2})$$

$$\text{TOF} = I/(2Fnm)$$

where  $m$  is the mass loading of Pd based on the ICP results and  $I$  is the polarization current (A). The factor 2 is the number of electrons transferred per HCOOH molecule.

### **Characterization**

The morphology of the samples was investigated via transmission electron microscope (TEM, JEOL-F200, 200 kV). The microstructure was analyzed by spherical aberration corrected high-angle annular dark field scanning transmission

electron microscope (HAADF-STEM, FEI Titan Cubed Themis G2 30). X-ray diffraction analysis (XRD) were performed on Rigaku Mini Flex 600 with Cu K $\alpha$  radiation ( $\lambda=1.5418\text{\AA}$ ). The measurements were conducted at a scan rate of  $1.0^\circ/\text{min}$  between  $30\text{-}90^\circ$ . The elemental valence analysis was performed by X-ray photoelectron spectroscopy (XPS, Thermo Electron, Al K $\alpha$  X-rays, 1486.6 eV). The compositions of the samples were tested by inductively coupled plasma mass spectrometry (ICP-MS, Avio 2000).

### **Theoretical calculation**

We have employed the Vienna Ab Initio Package (VASP)<sup>1, 2</sup> to perform all the density functional theory (DFT) calculations within the generalized gradient approximation (GGA) using the PBE formulation.<sup>3</sup> We have chosen the projected augmented wave (PAW) potentials to describe the ionic cores and taken valence electrons into account using a plane wave basis set with a kinetic energy cutoff of 400 eV.<sup>4, 5</sup> Partial occupancies of the Kohn–Sham orbitals were allowed using the Gaussian smearing method and a width of 0.05 eV. The electronic energy was considered self-consistent when the energy change was smaller than  $10^{-5}$  eV. A geometry optimization was considered convergent when the force change was smaller than  $0.02\text{ eV/\AA}$ . Grimme’s DFT-D3 methodology was used to describe the dispersion interactions.<sup>6</sup>

The equilibrium lattice constant of fcc unit cell was optimized to be  $a=3.886\text{ \AA}$  using a  $10\times 10\times 10$  Monkhorst-Pack k-point grid for Brillouin zone sampling. We then use it

to construct a pristine Pd(111) surface model with  $p(3\times 2\sqrt{3})$  periodicity in the x and y directions and 4 atomic layers in the z direction separated by a vacuum layer in the depth of 15 Å in order to separate the surface slab from its periodic duplicates. This surface model contains 48 Pd atoms. During structural optimizations, a  $2\times 2\times 1$  k-point grid in the Brillouin zone was used for k-point sampling, and the bottom two atomic layers were fixed while the top two were allowed to relax.

The adsorption energy ( $E_{ads}$ ) of adsorbate A was defined as

$$E_{ads} = E_{A/surf} - E_{surf} - E_{A(g)}$$

where  $E_{A/surf}$ ,  $E_{surf}$  and  $E_{A(g)}$  are the energy of adsorbate A adsorbed on the surface, the energy of clean surface, and the energy of isolated A molecule in a cubic periodic box with a side length of 20 Å and a  $1\times 1\times 1$  Monkhorst-Pack k-point grid for Brillouin zone sampling, respectively. The free energy of a gas phase molecule or an adsorbate on the surface was calculated by the equation  $G = E + ZPE - TS$ , where E is the total energy, ZPE is the zero-point energy, T is the temperature in kelvin (298.15 K is set here), and S is the entropy.

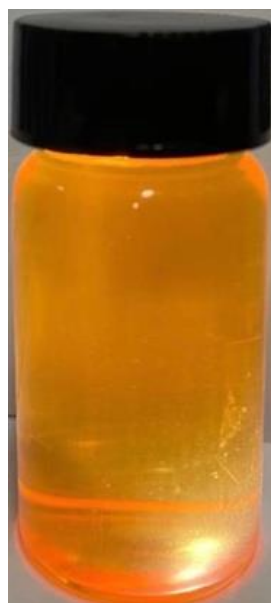

Fig. S1. An optical photograph of the  $P_n^-$  in anhydrous ethanol.

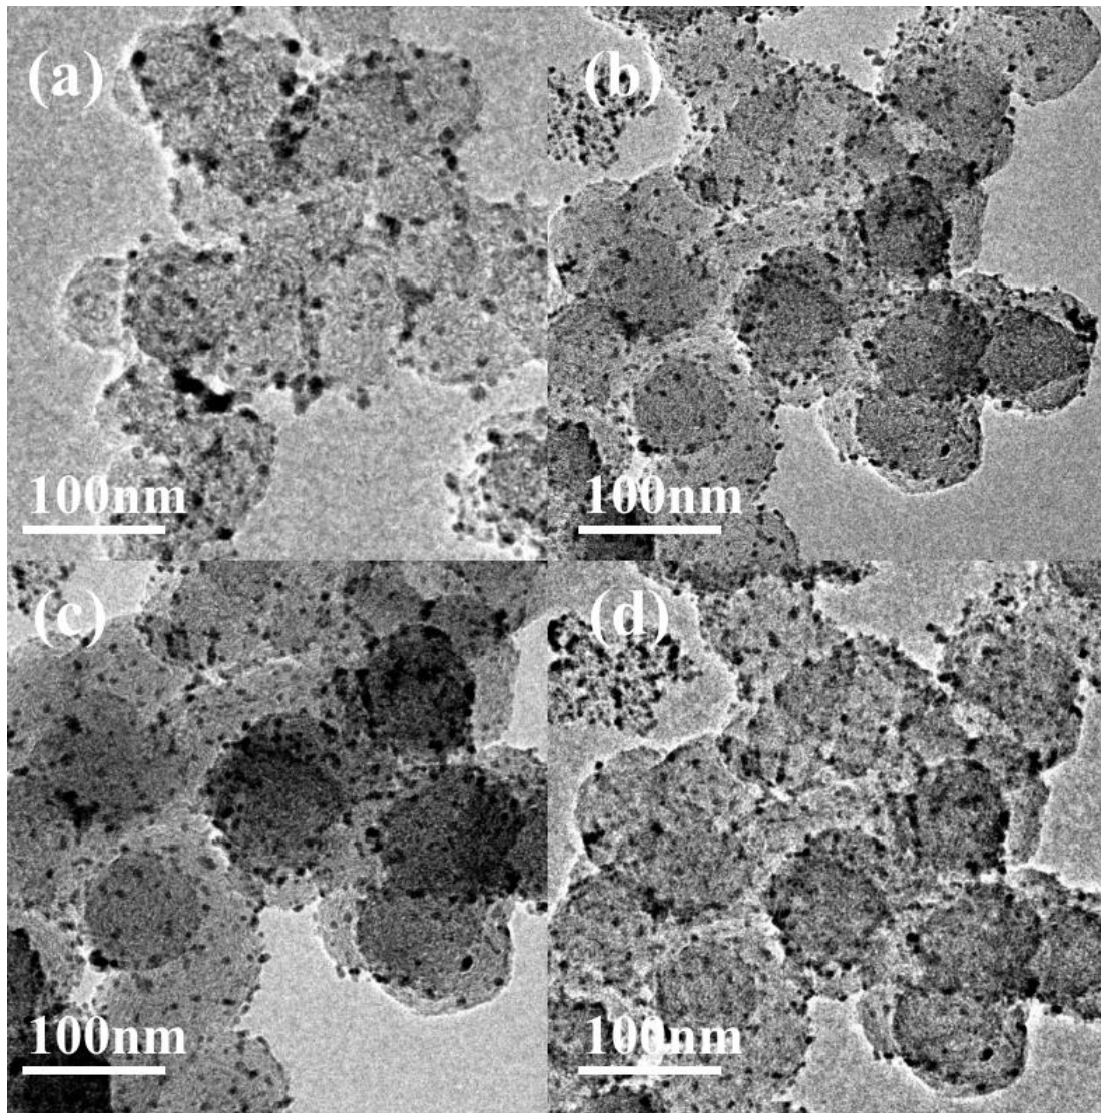

Fig. S2. TEM images of (a) P-Pd<sub>1</sub>Au<sub>1</sub>, (b) P-Pd<sub>4</sub>Au<sub>1</sub>, (c) P-Pd<sub>40</sub>Au<sub>1</sub>, (d) P-Pd<sub>60</sub>Au<sub>1</sub>.



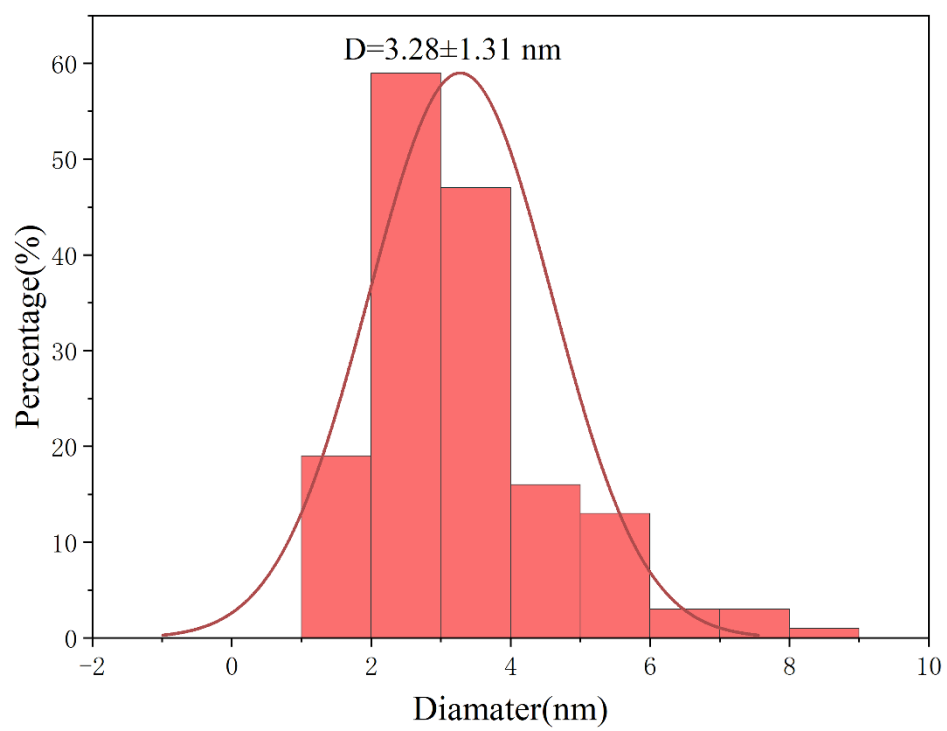

Fig. S3. Particle size distribution of P-Pd<sub>40</sub>Au<sub>1</sub>.

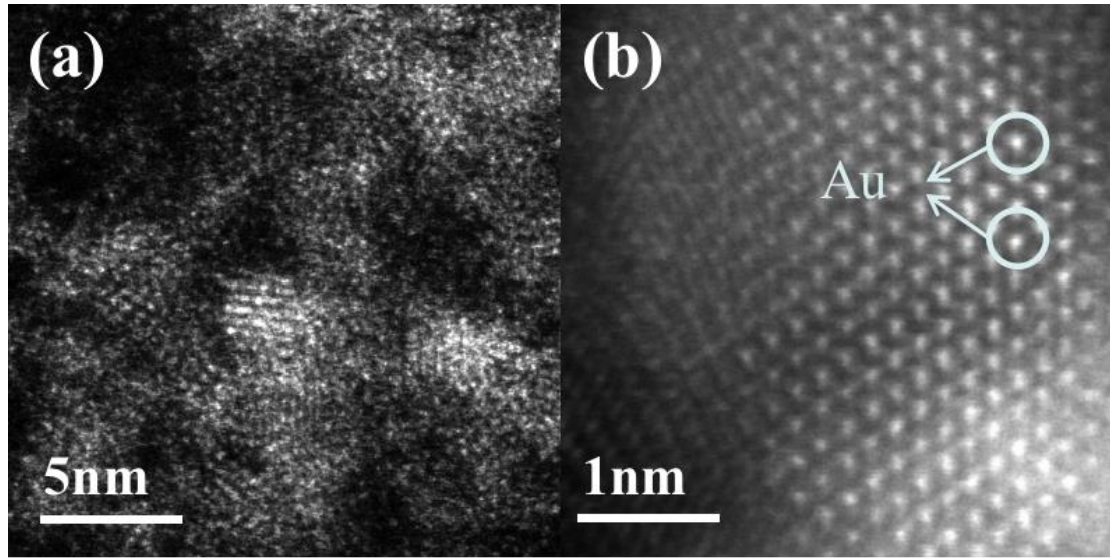

Fig. S4. HAADF-STEM images of P-Pd<sub>40</sub>Au<sub>1</sub>.

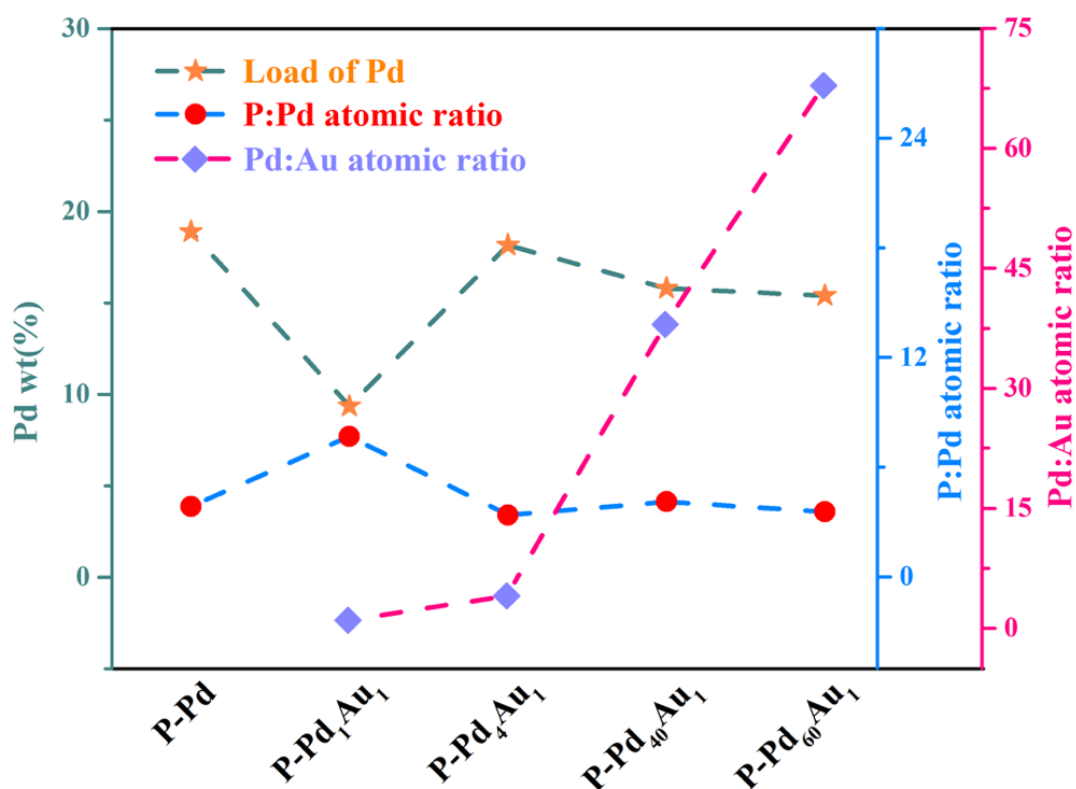

Fig. S5. The Pd content, atomic ratio of P to Pd, and atomic ratio of Pd to Au of P-Pd, P-Pd<sub>60</sub>Au<sub>1</sub>, P-Pd<sub>40</sub>Au<sub>1</sub>, P-Pd<sub>4</sub>Au<sub>1</sub>, and P-Pd<sub>1</sub>Au<sub>1</sub> determined by ICP.

The specific compositions of the samples were measured by ICP. As shown in Fig. S5, the Pd contents of the samples are around 20 wt% except for P-Pd<sub>1</sub>Au<sub>1</sub>, consistent with the molar ratio of metal precursors. The atomic ratio of Pd to Au ranges from ~1 (P-Pd<sub>1</sub>Au<sub>1</sub>) to ~68 (P-Pd<sub>60</sub>Au<sub>1</sub>) with the decrease of Au content. The atomic ratio of P to Pd is around 4 for P-Pd, P-Pd<sub>4</sub>Au<sub>1</sub>, P-Pd<sub>40</sub>Au<sub>1</sub> and P-Pd<sub>60</sub>Au<sub>1</sub>. The slight higher atomic ratio of P to Pd in P-Pd<sub>1</sub>Au<sub>1</sub> is caused by the excessive Au substitution. The ICP results manifest high reliability of this P<sub>n</sub><sup>-</sup> mediated P-doping/reduction process.

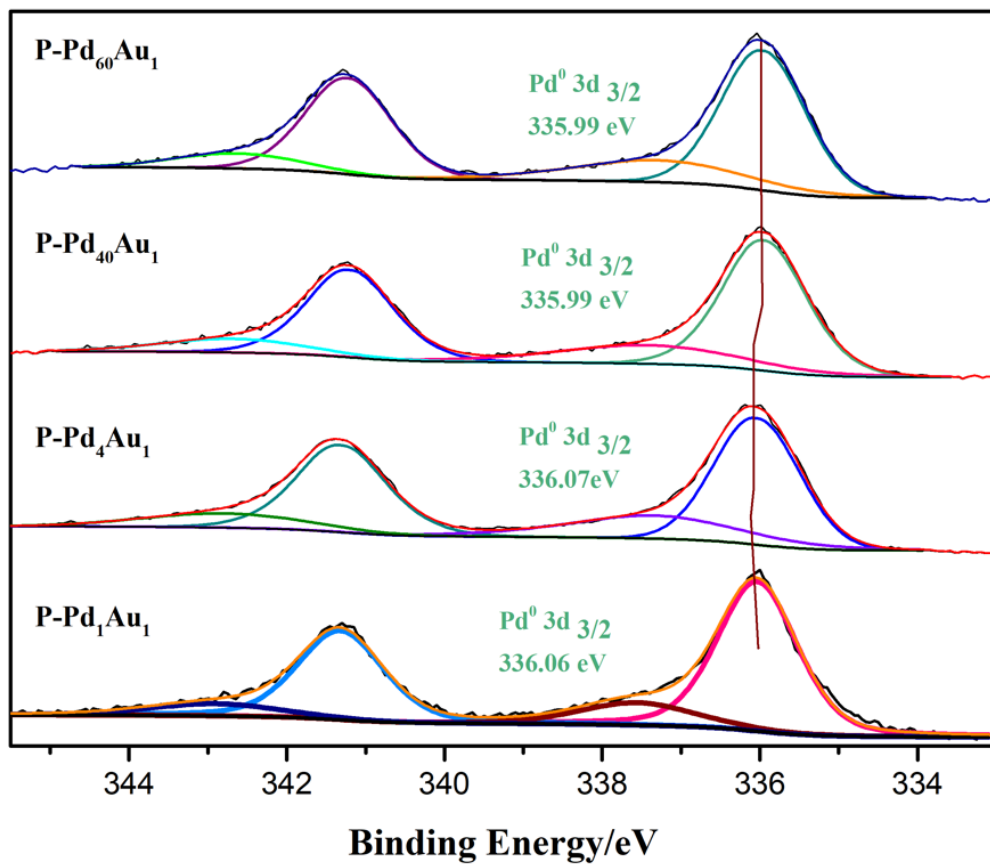

Fig. S6. XPS spectra of Pd 3d orbitals of P-Pd<sub>60</sub>Au<sub>1</sub>, P-Pd<sub>40</sub>Au<sub>1</sub>, P-Pd<sub>4</sub>Au<sub>1</sub>, and P-Pd<sub>1</sub>Au<sub>1</sub>.

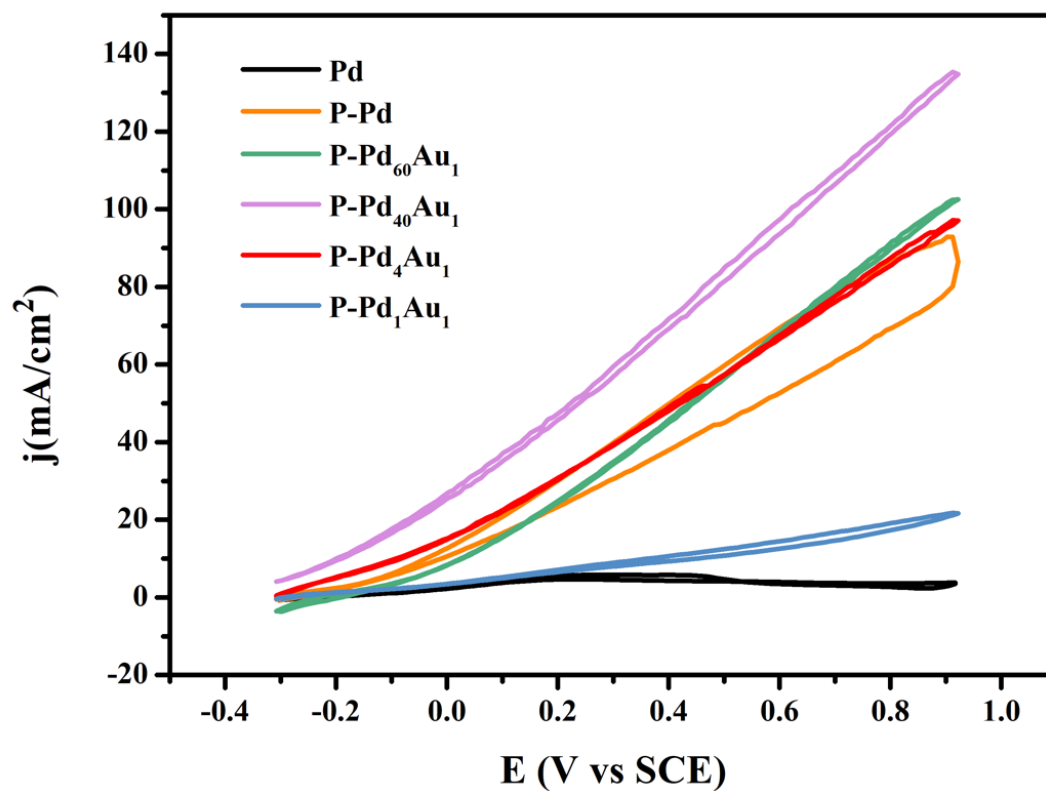

Fig. S7. FAOR polarization curves of the P-PdAu, P-Pd and Pd/C recorded in an Ar-saturated mixed solution of 0.1 M  $\text{HClO}_4$  and 2 M  $\text{HCOOH}$  (normalized by geometric area of electrode).

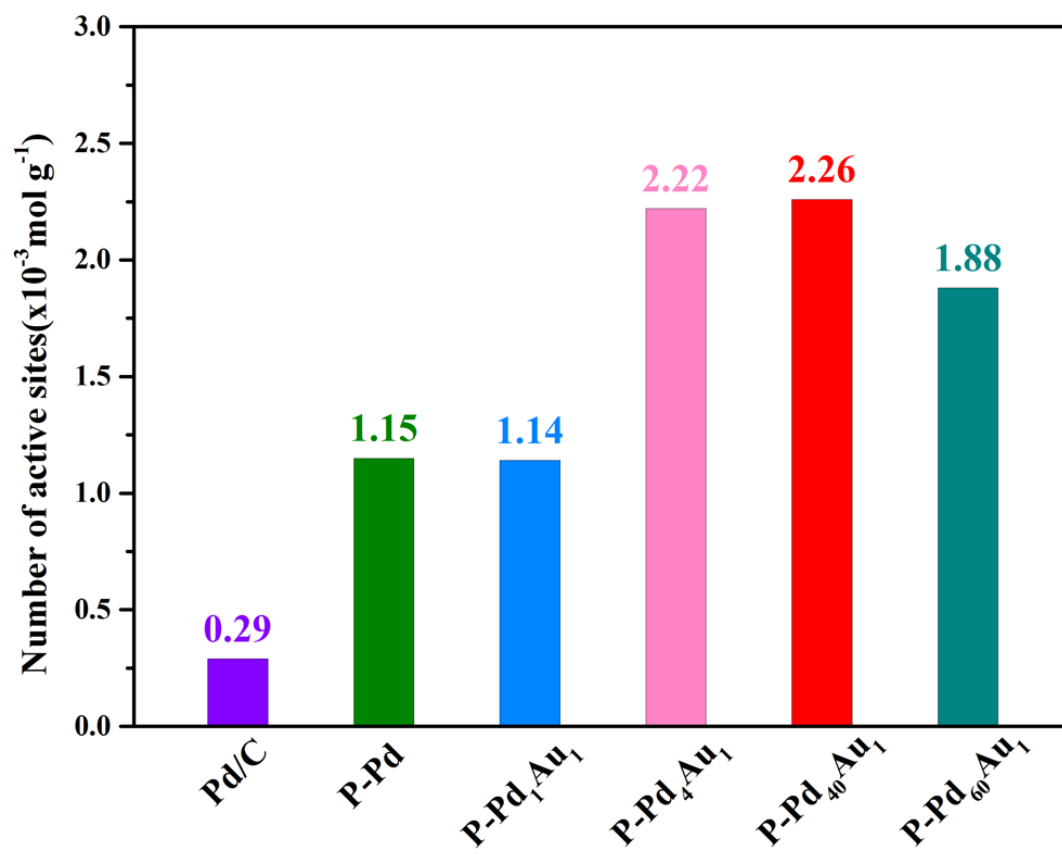

Fig. S8. Number of active sites of P-PdAu, P-Pd and commercial Pd/C.

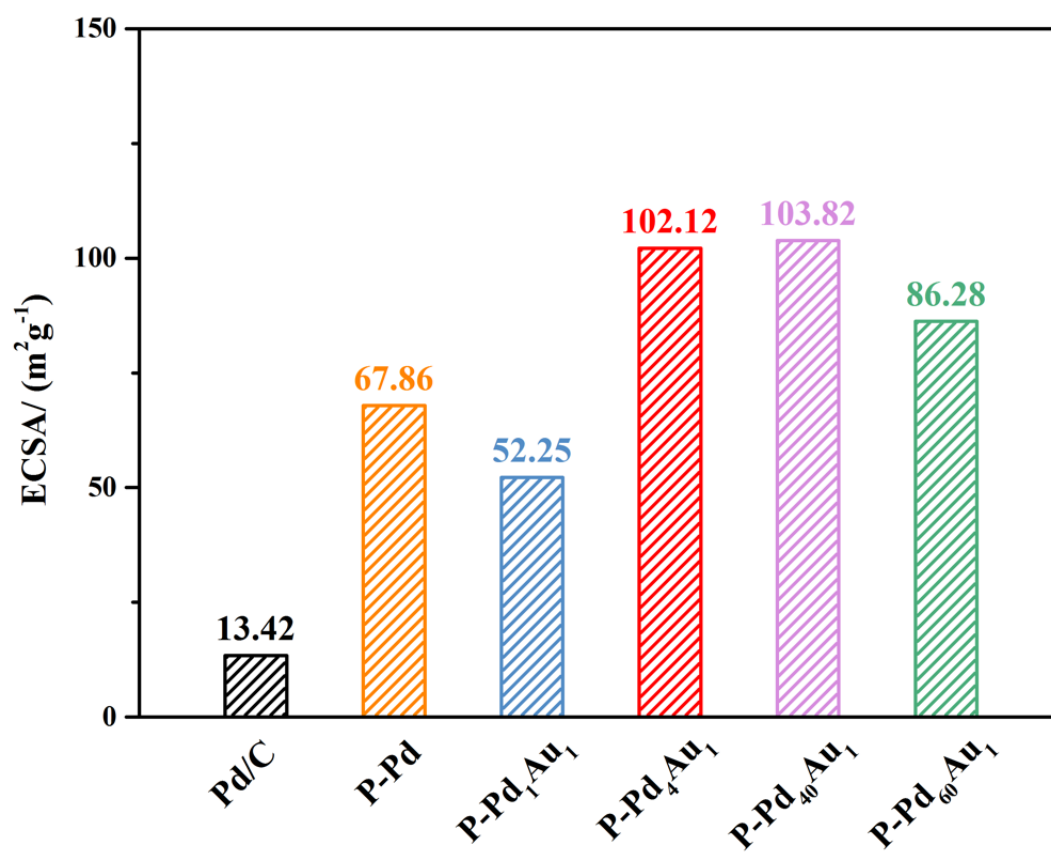

Fig. S9. ECSA of P-PdAu, P-Pd and commercial Pd/C.

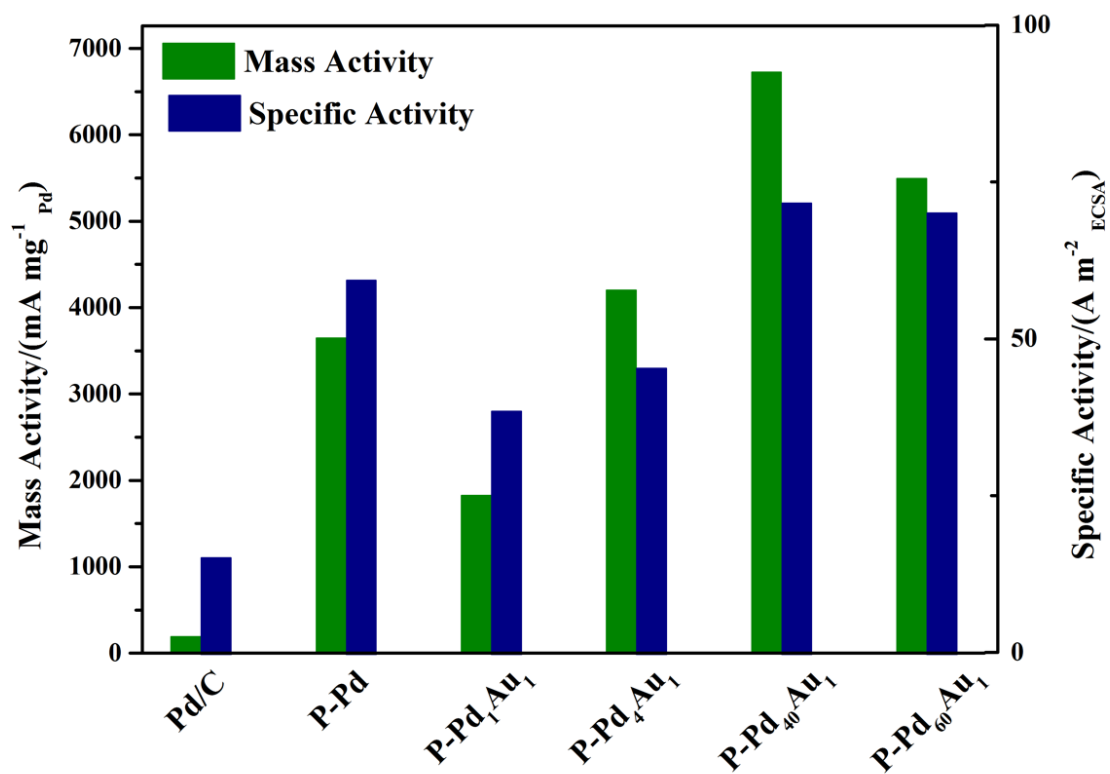

Fig. S10. The mass activities and specific activities of P-PdAu, P-Pd and commercial Pd/C.



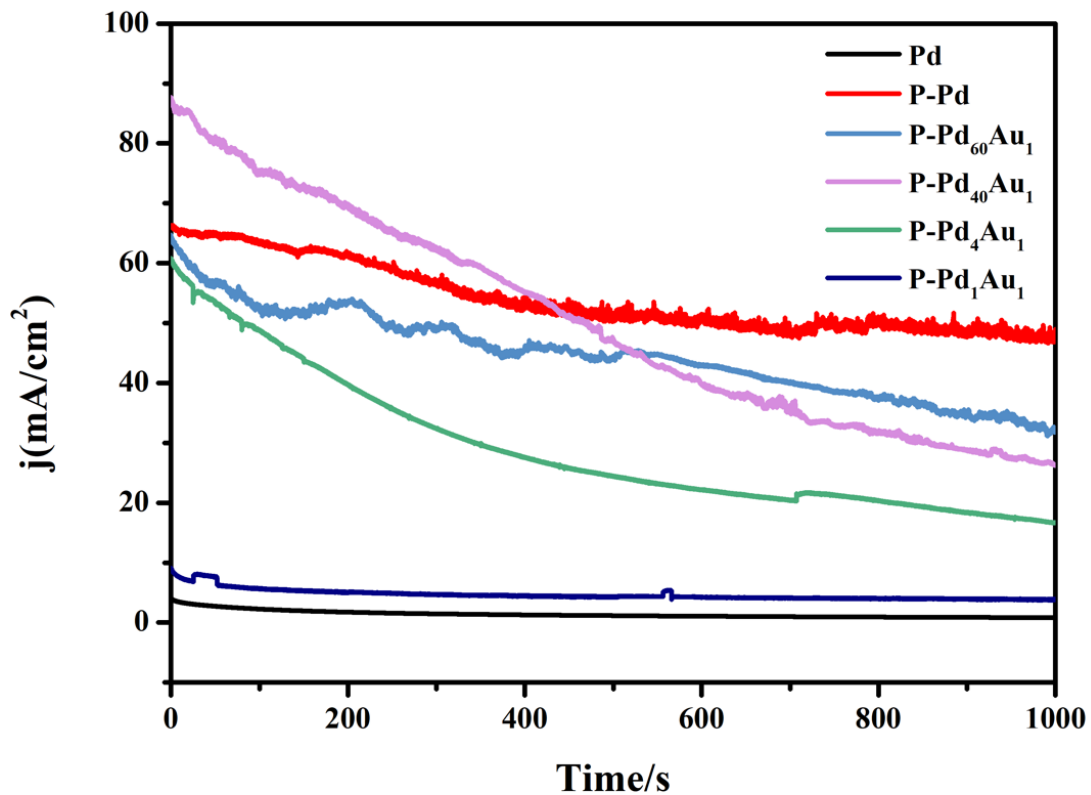

Fig. S11 1000s stability test of the P-PdAu, P-Pd and Pd/C at a sweep rate of 50 mV/s in an Ar-saturated mixed solution of 0.1 M HClO<sub>4</sub> and 2 M HCOOH (normalized by geometric area of electrode).

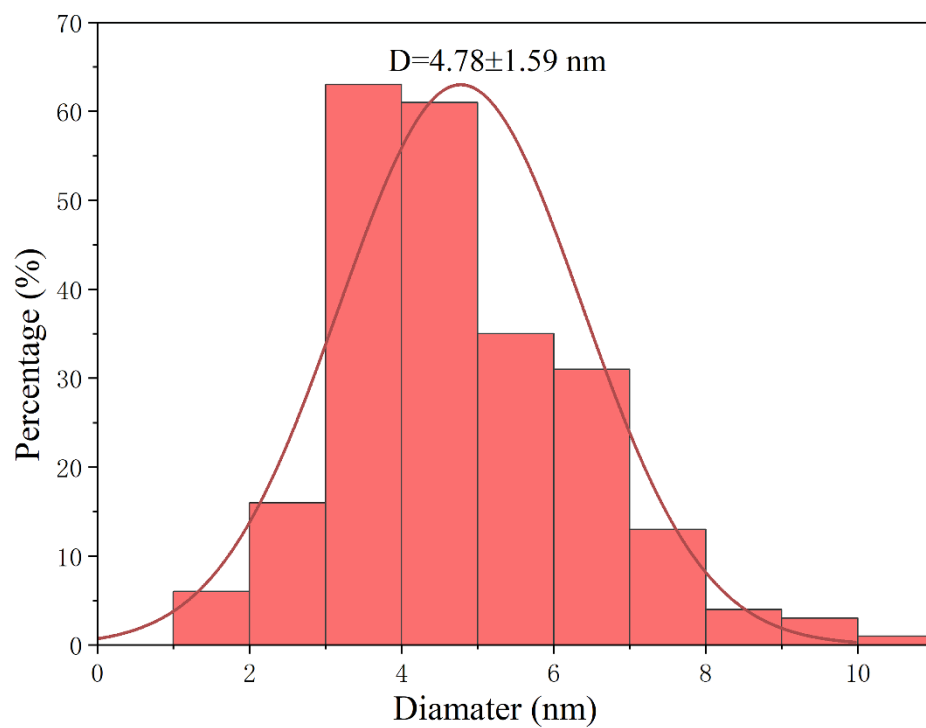

Fig. S12. Particle size distribution of P-Pd<sub>40</sub>Au<sub>1</sub> after the stability test.

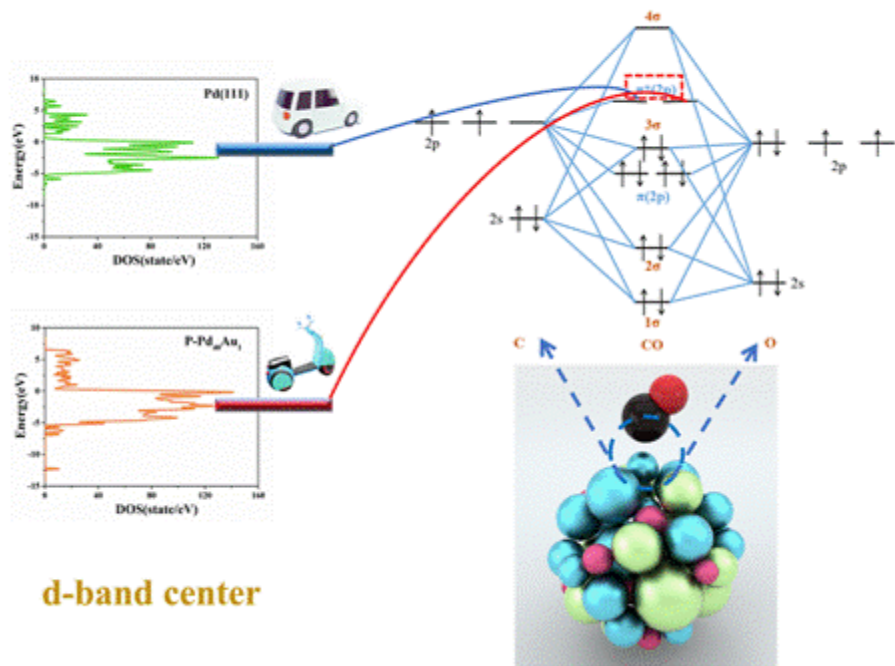

Fig. S13. Density of states of P-Pd<sub>40</sub>Au<sub>1</sub> and Pd and molecular orbital of CO.

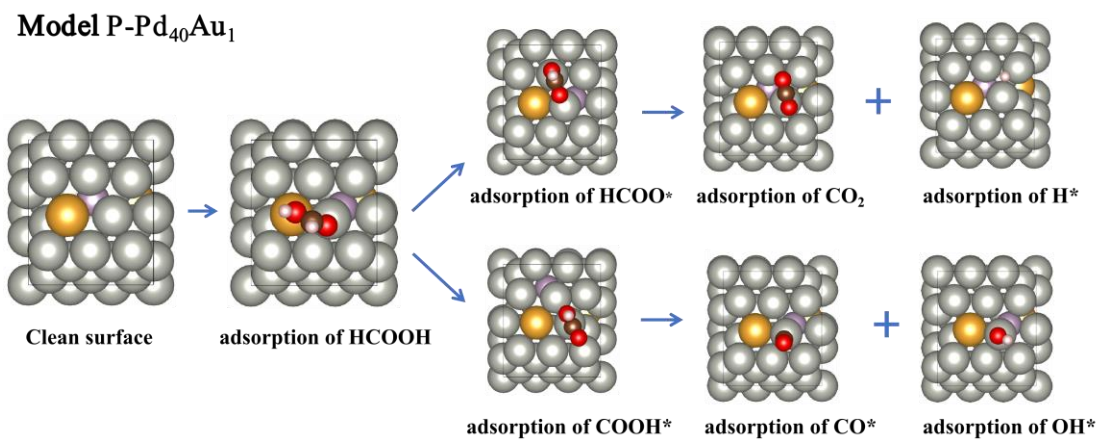

Fig. S14. The decomposition pathway of formic acid molecule on P-Pd<sub>40</sub>Au<sub>1</sub> model. Color code: Gray, pink, yellow, brown, red and mauve represent Pd, P, Au, C, O and H respectively.

### Model P-Pd

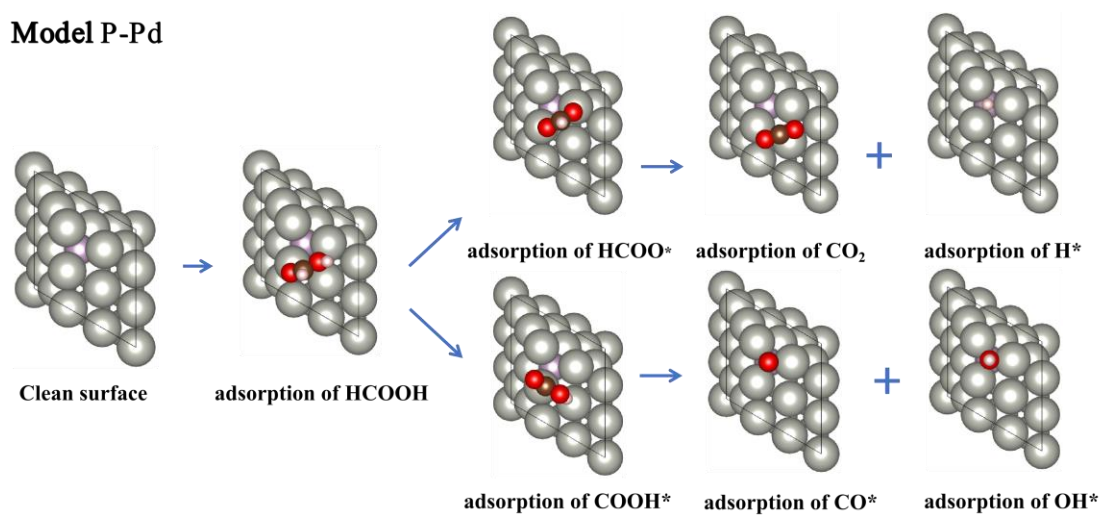

Fig. S15. The decomposition pathway of formic acid molecule on P-Pd model.

Color code: Gray, pink, brown, red and mauve represent Pd, P, C, O and H respectively.

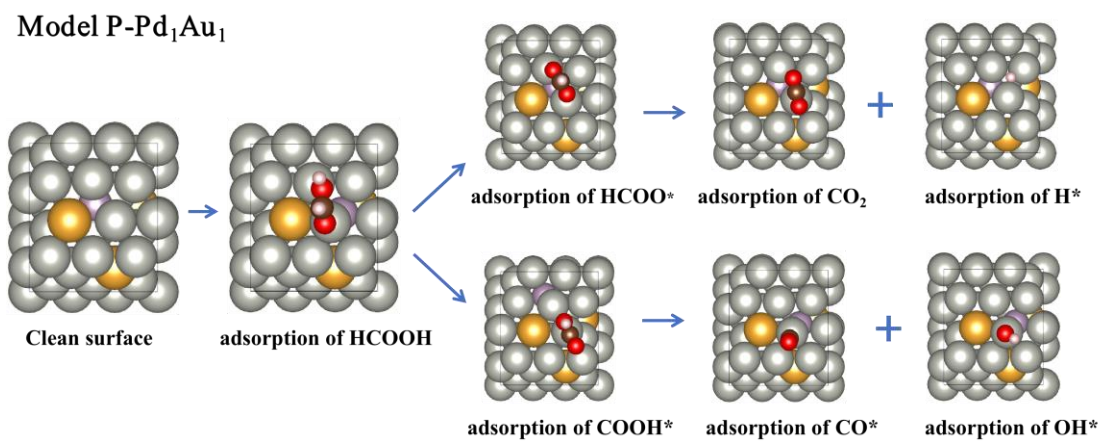

Fig. S16. The decomposition pathway of formic acid molecule on P-Pd<sub>1</sub>Au<sub>1</sub> model. Color code: Gray, pink, yellow, brown, red and mauve represent Pd, P, Au, C, O and H respectively.

Table S1 The Pd, Au and P contents of the samples.

|           | <b>P-Pd</b> | <b>P-Pd<sub>1</sub>Au<sub>1</sub></b> | <b>P-Pd<sub>4</sub>Au<sub>1</sub></b> | <b>P-Pd<sub>40</sub>Au<sub>1</sub></b> | <b>P-Pd<sub>60</sub>Au<sub>1</sub></b> |
|-----------|-------------|---------------------------------------|---------------------------------------|----------------------------------------|----------------------------------------|
| Pd (wt %) | 18.9        | 9.36                                  | 18.16                                 | 15.8                                   | 15.4                                   |
| Au (wt %) | \           | 9.36                                  | 4.46                                  | 0.42                                   | 0.23                                   |
| P (wt %)  | 0.73        | 0.72                                  | 0.62                                  | 0.65                                   | 0.55                                   |

Table S2. Comparison of  $Q_{CO}$ , ECSA,  $n$  and TOF of P-PdAu, P-Pd and commercial Pd/C.

| Catalysts                          | $Q_{CO}$ (m C) | ECSA ( $m^2 g^{-1}$ ) | Number of active sites ( $10^{-3} mol g^{-1}$ ) | TOF at the 0.8V ( $s^{-1}$ ) |
|------------------------------------|----------------|-----------------------|-------------------------------------------------|------------------------------|
| Commercial Pd/C                    | 0.28           | 13.42                 | 0.29                                            | 2.52                         |
| P-Pd                               | 1.42           | 67.87                 | 1.15                                            | 11.91                        |
| P-Pd <sub>1</sub> Au <sub>1</sub>  | 0.51           | 52.25                 | 1.14                                            | 7.34                         |
| P-Pd <sub>4</sub> Au <sub>1</sub>  | 1.95           | 102.12                | 2.22                                            | 8.831                        |
| P-Pd <sub>40</sub> Au <sub>1</sub> | 1.72           | 103.82                | 2.26                                            | 13.87                        |
| P-Pd <sub>60</sub> Au <sub>1</sub> | 1.40           | 86.28                 | 1.88                                            | 13.14                        |



## References

1. Kresse, G.; Furthmüller, J. Efficiency of Ab-Initio Total Energy Calculations for Metals and Semiconductors Using a Plane-Wave Basis Set. *Comput. Mater. Sci.* 1996, 6, 15–50.
2. Kresse, G.; Furthmüller, J. Efficient Iterative Schemes for Ab Initio Total-Energy Calculations Using a Plane-Wave Basis Set. *Phys. Rev. B* 1996, 54, 11169–11186.
3. Perdew, J. P.; Burke, K.; Ernzerhof, M. Generalized Gradient Approximation Made Simple. *Phys. Rev. Lett.* 1996, 77, 3865–3868.
4. Kresse, G.; Joubert, D. From Ultrasoft Pseudopotentials to the Projector Augmented-Wave Method. *Phys. Rev. B* 1999, 59, 1758-1775.
5. Blöchl, P. E. Projector Augmented-Wave Method. *Phys. Rev. B* 1994, 50, 17953–17979.
6. Grimme, S.; Antony, J.; Ehrlich, S.; Krieg, H. *J. Chem. Phys.* 2010, 132, 154104.
